# Supplementary material
Source: PubMed Central journal article supplement (PMC4857473)
Supplement: supp_jiw025_jiw025supp.pdf [file supp_jiw025_jiw025supp.pdf]

## SUPPLEMENTARY DATA

### Cervical Cytokine and Chemokine Analyses

The MILLIPLEX<sub>MAP</sub> Human Cytokine/Chemokine Magnetic Bead Panel – Premixed 41 Plex was used to quantify the following analytes per the manufacturer's instructions: VEGF, TNF- $\beta$ , TNF- $\alpha$ , TGF- $\alpha$ , RANTES, PDGF-AB/BB, PDGF-AA, MIP-1 $\beta$ , MIP-1 $\alpha$ , MDC (CCL22), MCP-3, MCP-1, IP-10, IL-17, IL-15, IL-13, IL-12 (p70), IL-12 (p40), IL-10, IL-9, IL-8, IL-7, IL-6, IL-5, IL-4, IL-3, IL-2, IL-1RA, IL-1 $\beta$ , IL-1 $\alpha$ , IFN- $\gamma$ , IFN- $\alpha$ 2, GRO, GM-CSF, G-CSF, Fractalkine, Flt-3 ligand, FGF-2, Eotaxin, EGF, and sCD40L. A custom Human Chemokine 8-Plex panel (Bio-Rad Laboratories, Inc., Hercules, CA) was used to measure the following analytes: I-TAC/CXCL11, MCP-2/CCL8, MCP-4/CCL13, MIG/CXCL9, MIP-3 $\alpha$ /CCL20, MIP-3 $\beta$ /CCL19, MPIF-1/CCL23, and SDF-1 $\alpha$ + $\beta$ /CXCL12.

IL-1 $\beta$ , IL-6, IL-8, MCP-2, and MDC levels were increased significantly in CVL specimens from *M. genitalium*-positive women (Table 1;  $p < 0.05$ , Student's T test). The following analytes did not show any significant modulation (up or down) in specimens from women chronically infected with *M. genitalium* relative to women without *M. genitalium* infection ( $p > 0.05$ ): TNF- $\alpha$ , RANTES, MCP-1, IP-10, IL-7, IL-9, IL-1 $\alpha$ , IL-1RA, PDGF-AB/BB, PDGF-AA, IL-10, GRO, IFN- $\alpha$ 2, Flt-3 ligand, G-CSF, FGF-2, Eotaxin, EGF, I-TAC (CXCL11), and MIG (CXCL9). The following analytes were below the limit of detection in all specimens: VEGF, TNF- $\beta$ , TGF- $\alpha$ , MIP-1 $\beta$ , MIP-1 $\alpha$ , MCP-3, IL-17, IL-15, IL-13, IL-12 (p70), IL-12 (p40), IL-5, IL-4, IL-3, IL-2, IFN- $\gamma$ , GM-CSF, Fractalkine, sCD40L, MCP-4/CCL13, MIP-3 $\alpha$ /CCL20, MIP-3 $\beta$ /CCL19, MPIF-1/CCL23, and SDF-1 $\alpha$ + $\beta$ /CXCL12 (denoted as not detected [ND] in Supplementary Table 1).

**Supplementary Table 1. Comprehensive quantitative analysis of secreted cytokines and chemokines in cervicovaginal lavages (CVLs) from subjects chronically infected with *M. genitalium* compared to subjects in the cohort that never tested positive.**

| Analyte                         | <i>M. genitalium</i> Negative <sup>a</sup> | Chronic <i>M. genitalium</i> <sup>a</sup> | <i>P</i> <sup>b</sup> |
|---------------------------------|--------------------------------------------|-------------------------------------------|-----------------------|
| <b>EGF</b>                      | 6.6 (2.8)                                  | 19.1 (10.2)                               | 0.15                  |
| <b>FGF-2</b>                    | 4.9 (1.1)                                  | 6.6 (1.8)                                 | 0.41                  |
| <b>Eotaxin</b>                  | 4.5 (1.3)                                  | 10.1 (1.5)                                | 0.01                  |
| <b>TGF-<math>\alpha</math></b>  | ND <sup>c</sup>                            | ND                                        |                       |
| <b>G-CSF</b>                    | 32.3 (9.9)                                 | 746.5 (393.7)                             | 0.02                  |
| <b>Flt-3L</b>                   | 7.9 (4.7)                                  | 20.6 (8.4)                                | 0.16                  |
| <b>GM-CSF</b>                   | ND                                         | ND                                        | N/A                   |
| <b>Fractalkine</b>              | ND                                         | ND                                        | N/A                   |
| <b>IFN-<math>\alpha</math>2</b> | 133.7 (82.7)                               | 121.1 (82.1)                              | 0.92                  |
| <b>IFN-<math>\gamma</math></b>  | ND                                         | ND                                        | N/A                   |
| <b>GRO</b>                      | 627.9 (349.8)                              | 225.8 (104.4)                             | 0.38                  |
| <b>IL-10</b>                    | 1.1 (0.4)                                  | 1.4 (0.3)                                 | 0.50                  |
| <b>MCP-3</b>                    | ND                                         | ND                                        | N/A                   |
| <b>IL-12p40</b>                 | 1.4 (0.7)                                  | 3.1 (1.1)                                 | 0.19                  |
| <b>MDC</b>                      | 11.9 (4.8)                                 | 40.9 (11.0)                               | 0.009                 |
| <b>IL-12p70</b>                 | ND                                         | ND                                        | N/A                   |
| <b>PDGF-AA</b>                  | 34.7 (32.0)                                | 199.6 (155.5)                             | 0.21                  |
| <b>IL-13</b>                    | ND                                         | ND                                        | N/A                   |
| <b>PDGF-AB/BB</b>               | 26.4 (9.9)                                 | 42.7 (12.3)                               | 0.31                  |

|                                 |               |               |      |
|---------------------------------|---------------|---------------|------|
| <b>IL-15</b>                    | ND            | ND            | N/A  |
| <b>sCD40L</b>                   | ND            | ND            | N/A  |
| <b>IL-17A</b>                   | ND            | ND            | N/A  |
| <b>IL-1RA</b>                   | 2275 (509.3)  | 3602 (1616)   | 0.36 |
| <b>IL-1<math>\alpha</math></b>  | 495.6 (228.1) | 1331 (594.8)  | 0.14 |
| <b>IL-9</b>                     | 1.0 (0.1)     | 2.1 (0.5)     | 0.01 |
| <b>IL-1<math>\beta</math></b>   | 5.1 (2.1)     | 113.4 (60.4)  | 0.03 |
| <b>IL-2</b>                     | ND            | ND            | N/A  |
| <b>IL-3</b>                     | ND            | ND            | N/A  |
| <b>IL-4</b>                     | ND            | ND            | N/A  |
| <b>IL-5</b>                     | ND            | ND            | N/A  |
| <b>IL-6</b>                     | 0.3 (0.2)     | 13.5 (7.3)    | 0.03 |
| <b>IL-7</b>                     | 2.7 (1.5)     | 4.0 (1.6)     | 0.58 |
| <b>IL-8</b>                     | 216.6 (115.9) | 986.2 (325.8) | 0.01 |
| <b>IP-10</b>                    | 190.9 (114.0) | 90.5 (37.2)   | 0.50 |
| <b>MCP-1</b>                    | 66.4 (43.6)   | 220.5 (88.1)  | 0.09 |
| <b>MIP-1<math>\alpha</math></b> | ND            | ND            | N/A  |
| <b>MIP-1<math>\beta</math></b>  | ND            | ND            | N/A  |
| <b>RANTES</b>                   | 4.4 (3.1)     | 7.3 (3.1)     | 0.54 |
| <b>TNF-<math>\alpha</math></b>  | 1.2 (1.1)     | 0.3 (0.1)     | 0.50 |
| <b>TNF-<math>\beta</math></b>   | ND            | ND            | N/A  |
| <b>VEGF</b>                     | ND            | ND            | N/A  |
| <b>I-TAC/CXCL11</b>             | 0.1 (0.01)    | 0.1 (0.01)    | 0.16 |
| <b>MCP-2/CCL8</b>               | 0.07 (0.01)   | 0.13 (0.04)   | 0.03 |

|                                                           |               |              |      |
|-----------------------------------------------------------|---------------|--------------|------|
| <b>MCP-4/CCL13</b>                                        | ND            | ND           | N/A  |
| <b>MIG/CXCL9</b>                                          | 259.4 (119.6) | 213.4 (64.6) | 0.77 |
| <b>MIP-3<math>\alpha</math>/CCL20</b>                     | ND            | ND           | N/A  |
| <b>MIP-3<math>\beta</math>/CCL19</b>                      | ND            | ND           | N/A  |
| <b>MPIF-1/CCL23</b>                                       | ND            | ND           | N/A  |
| <b>SDF-1<math>\alpha</math>+<math>\beta</math>/CXCL12</b> | ND            | ND           | N/A  |

<sup>a</sup>Data expressed at mean pg/mL (standard error of the mean).

<sup>b</sup>*P*-value is for Student's T test.

<sup>c</sup>ND, Analyte below the limit of detection of the assay.
